# Supplementary material
Source: Springer Nature journal article supplement (https://www.springermedizin.de/resource/supplementary/12913_2012_2585_MOESM2_ESM.pdf/9530978)

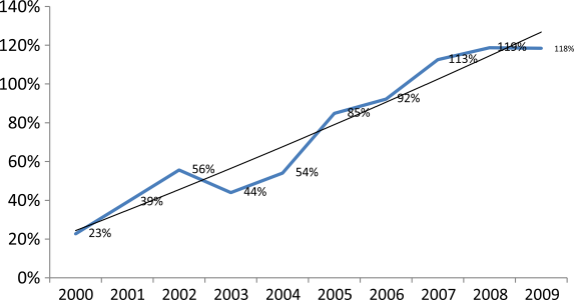

Supplement: MOESM2 [file 9530978]
